# Supplementary material for: Recommendations for an exercise intervention and core outcome set for older patients after hospital discharge: Results of an international Delphi study
Source: PubMed Central journal article supplement (PMC10038288; doi:10.1371/journal.pone.0283545), 2023-03-24
Supplement: pone.0283545.s004.pdf [file pone.0283545.s004.pdf]

## PLOS ONE

**Jean-Philippe Regnaud, Ph.D, PT, academic Editor PLOS ONE**

Amsterdam, February 17th, 2023

**Ref.:** PONE-D-22-27730 - EMID:412179192e340840

**Title:** “Recommendations for an exercise intervention and core outcome set for older patients after hospital discharge: results of an international Delphi study”

**Journal:** PLOS ONE

Dear Regnaud, academic editor

Thank you very much for the intended publication of our manuscript, entitled “Recommendations for an exercise intervention and core outcome set for older patients after hospital discharge: results of an international Delphi study”

We are grateful for the requests concerning our manuscript which allowed us to further improve our manuscript. We would like to thank the PLOS ONE staff for their time and effort. Please find below our response to the valuable comments of the reviewers.

We have uploaded this letter with a response to each point raised by the PLOS ONE staff and labeled the document as ‘Response to Reviewers’. Also, a marked copy of the manuscript is uploaded that highlights changes made to the manuscript, labeled as ‘Revised Manuscript with Track Changes’. Finally, an unmarked version of the revised paper without tracked changes, labeled ‘Revised Manuscript’ is uploaded.

Hopefully everything is clear. Please don’t hesitate to contact us in case of any questions.

Yours sincerely,

Jesse Aarden, PhD, PT (corresponding author)

Amsterdam UMC, Academic Medical Center, University of Amsterdam, Department of Rehabilitation, Amsterdam Movement Sciences, Meibergdreef 9, Amsterdam, Netherlands

Email: [j.j.aarden@hva.nl](mailto:j.j.aarden@hva.nl), Phone: +31 646042763

On behalf of the co-authors:

- Mel Major, PhD, PT. Department of Rehabilitation Amsterdam UMC, location AMC, the Netherlands

- Claartje Aghina, MSc, Centre of expertise Urban Vitality, Faculty of Health, Amsterdam University of Applied Sciences, Amsterdam, The Netherlands
- Prof. dr. R.H.H. Engelbert. Department of Rehabilitation, Amsterdam UMC, location AMC, the Netherlands.
- Prof. dr. B.M. Buurman, Department of Internal Medicine, Section of Geriatric Medicine, Amsterdam UMC, location AMC, the Netherlands.
- Associate prof. dr. M. van der Schaaf, Department of Rehabilitation Amsterdam UMC, location AMC, the Netherlands.
- Associate prof. dr. M. van der Esch, Reade Center for Rehabilitation and Rheumatology Amsterdam, the Netherlands.

## **Additional Editor Comments (if provided):**

### **Response to PLOS ONE**

---

Dear Authors,

Your submission has been carefully read by reviewers. Their outputs are positive. They have addressed minor comments which, I think, will improve the quality of your manuscript. Few minor changes or clarifications need to be done before it can be accepted for the publication. I hope to have the pleasure of reading you soon.

#### ***Author response***

*Thank you for the positive feedback and the possibility to improve the manuscript. We are grateful that we can respond to the comments. The responses of the author are written in italics.*

#### **Reviewers' comments to the author:**

**Reviewer #1:** Thank you for the opportunity to review this really important Delphi study looking at exercise interventions and core outcomes for older people after hospital discharge.

My questions/responses are probably more thoughts about how the results of the Delphi might work in practice (particularly in a UK setting).

#### **Abstract:**

A clear overview of the study.

#### **Introduction:**

A good background and rationale for the study. I was just wondering though if you anticipate that the recommendations that you produce will be generalisable to healthcare systems across the world or was your focus on transitions from hospital to home in The Netherlands?

#### ***Author response***

*The starting point of the Delphi study was to include an international panel of experts. Therefore the outcomes are generalizable to healthcare systems across the world. In the end, we included experts from seven different countries with five experts from the Netherlands. Primary reason that we included more experts from the Netherlands was that we wanted experts with practical expertise who still work in the field of geriatrics rehabilitation. In the end we think that the results will be generalizable although this should be adjusted to the different healthcare settings across the world.*

**Methods:**

Paragraph 1 - line 5: I am not clear what location AMC means or how it fits into this sentence?

**Author response**

*The Amsterdam UMC has 2 locations (AMC and VU) and we understand that this could be confusing. We deleted location AMC in the revised manuscript in the Methods section on page 6.*

You say there is a case description of an acutely hospitalized older adult and information from open questions in the supplementary material but I cannot find this information or am I missing something obvious?

**Author response**

*We included the case description in the supplementary material.*

Can you just clarify that by handover information you mean the information that is passed onto the healthcare professional/other who will be working with the older person in the community? Not information directly for the patient?

**Author response**

*Handover information is the information that is passed onto the healthcare professional from Hospital towards the primary care. We added 'from hospital on to healthcare professionals in primary care.' in the methods section on page 6.*

**Results:**

Clear and concise

**Discussion:**

Paragraph 2 - I totally agree that exercise and physical activity are not continued because of a lack of stimulus and self-discipline but there are also other factors including lack of community staff/support to follow-up these people (at least this is the case in the UK - hence my question about the scope of these results in countries other than the Netherlands) - so, by stimulus do you mean a person their to motivate the older person?

**Author response**

*We added the suggestion to the discussion on page 11: 'After discharge from hospital, exercises and physical activity are often not continued because stimulus by staff or community<sup>21</sup> and/or self-discipline<sup>17</sup> are lacking.'*

**Conclusion:**

I really appreciate that you have stated that this is a starting point and I really commend you on carrying out this work as a very important starting point

### ***Author response***

*Thank you very much for all your feedback and we fully agree.*

### **Reviewer #2: Manuscript review for: Recommendations for an exercise intervention and core outcome set for older patients after hospital discharge: results of an international Delphi study.**

Manuscript review for: Recommendations for an exercise intervention and core outcome set for older patients after hospital discharge: results of an international Delphi study.

Many thanks for the opportunity to review the above-named manuscript. Whilst the aims and objectives for study were clear, I feel there are a few methodological and analytical points of note that may need to be addressed.

My comments are noted below.

### **Abstract**

You added the keyword « resistance exercise training ». This term was only used in your abstract! It was not identified neither in the introduction nor in the results « exercise intervention » and figure 2. So, I am confused about the utility of this term. Please clarify

### ***Author response***

*Thanks for the comment because the resistance exercise training is not correct. We changed in the abstract on page 4 resistance exercise training in exercise intervention as used in the rest of the manuscript: ‘The results of this Delphi study can assist physical therapists to provide a tailored exercise intervention for older patients with complex care needs after hospital discharge, to prevent functional decline and/or restore physical function.’*

The authors mentioned in their abstract, line 6 “an internal panel of experts n=16” practically only 15 members responded so I think better to mention the number of responders instead.

### ***Author response***

*We agree with the reviewer that describing the responders is clearer. We changed the abstract on page 4: ‘An internal panel of experts in the field of exercise interventions for acutely hospitalized older adults were invited to join the study.’ Later in the abstract it is described that there are fifteen responders.*

### **Introduction**

Further consideration is needed about this section and the order of the paragraphs and there needs to be a stronger rationale for the research.

Perhaps there needs to give some context to “acute hospitalization” (description and duration).

**Author response**

*In the first sentence of the introduction a short description and duration is added: For older adults, an acute hospitalization for multiple days due to an acute illness is a high-risk event with poor health outcomes, including functional decline, readmission, and mortality.<sup>1</sup>*

Provide more context about exercise intervention (different types and programs) and its influence on functional decline with few examples and references. You mentioned that practical guidelines on FITT of home-based exercise intervention after hospitalization exists but are lacking! Citing the existing guidelines and giving more details about the content and its limitation could be helpful. Providing this sort would help to set the scene for the study more clearly and give significance to the results.

**Author response**

*We added information to second paragraph of the introduction with reference: ‘International exercise recommendations in older adults are reported,<sup>18,19</sup> These recommendations indicate that exercise improve physical function and quality of life and exercise is essential to older adults. However, practical guidelines on the frequency, intensity, time, and type (FITT) of home-based exercise interventions specifically for older patients after hospitalization are lacking.’*

The authors mentioned in their introduction, line 9 “In this study, in-hospital exercise programs to prevent functional decline were performed twice per day”. Which study? The context is not clear! This part should be addressed.

**Author response**

*Accidentally, the number of the reference was not included. We added reference <sup>14</sup> to the introduction: In this study<sup>14</sup>, in-hospital exercise programmes to prevent functional decline were performed twice per day.*

Further information /details are needed to describe the need for this study.

**Author response**

*At the end of the introduction on page 5, we added information to emphasize the novelty of this study: ‘In the absence of practical guidelines and high-quality randomized controlled trials focusing on acute hospitalized older adults, the Delphi methodology is often applied to obtain expert consensus on interventions for different populations.<sup>23,24</sup>’*

**Methods**

A stronger narrative on the scoping literature review approach is required.

What were the search keywords used for the scoping literature review?

**Author response**

*The scoping review was based on a search in Pubmed, Cinahl and Cochrane with MESH keywords such as aged, frail, hospitalization, hospital medicine, exercise therapy, resistance*

*training, physical therapy modalities, diagnostic tests. Also, other keywords from key articles were used in the search. Snowballing was performed on relevant article to retrieve a complete overview of the literature.*

The search was limited on the last 10 years! Please justify this choice

***Author response***

*The choice for the last 10 years is arbitrary and was based on the changing healthcare in the last decade with shorter length of stay of patients after an acute hospitalization.*

*Expert Panel.* Selection criteria, homogeneity, and panel size (minimum number of experts) were not mentioned in the “expert panel” part. More details are required

Panel members were identified as “experts”, how did you consider or measure experience? Based on years of clinical experience maybe! or number of publications in PubMed? (Cited in table 1) If yes, this should be included in the corresponding paragraph

***Author response***

*We wanted to select an international panel with a combination of expertise in this specific field of geriatric care. Eligibility of the expert panel was based on the field of expertise, geographical location, years of clinical expertise and the number of publications indexed in PubMed.*

The authors mentioned in the expert panel part, line 5 “Because no patients were included in this study, approval of the medical committee was not required.” Unsure if this is really useful, I prefer to delete this sentence.

***Author response***

*Based on the feedback of the reviewer we removed this sentence.*

*Delphi rounds.* How expert opinions were collected? Was it based on anonymous survey rounds, face-to-face or group encounters? Please clarify

***Author response***

*Expert opinions were collected by a digital anonymous survey. We added to the Delphi rounds in the Methods section: ‘A digital survey was sent to generate ideas and to rank statements on a 9-point Likert scale, as per Delphi methodology recommendations.’<sup>20</sup>*

How did you decide on the number and type of questions? I would like to have a look on supplementary material on case description and additional questions used in this study.

***Author response***

*The case description has been added to the supplementary material*

*Delphi round 3.* The authors mentioned that “If an individual panel member’s scores differed from the panel’s median scores, they were asked to consider re-ranking the statement towards the median to reach consensus.” Not clear. Please explain more the procedure. Was it based on a panel discussion?

***Author response***

*In the third round, individual panellists were asked if they were willing to adjust the score to the rest of the group. It was not possible to organize a physical meeting because of the international composition of the group*

**Results**

Why did the authors contact only 16 experts and mainly physical therapists?

***Author response***

*The authors of this article wanted to focus on therapists who are working with older adults and have expertise in the field of exercise. Although most of the panel is (also) physical therapist, six out of fifteen of the included panel have another profession.*

*Theme 1.* Daily exercise interventions, line 7 “1–2 times weekly interventions in the sub-acute phase” There is a disagreement with figure 2 where you mentioned that 2-3 times/week is required in sub-acute phase! Please clarify

***Author response***

*The manuscript is adjusted in Theme 1 in the Results section: ‘Regarding training frequency, daily exercise interventions in the acute phase (up to 7 days post-discharge), 2–3 times weekly interventions in the sub-acute phase (up to 12 weeks post-discharge) and 1-12 times weekly in the long-term phase (>12 weeks post-discharge) were consensually ranked as essential for preventing functional decline.’*

The panel agreed on level intensity “70-80%” of the maximal heart rate. This requires elaboration about progressive training.

***Author response***

*It is interesting to elaborate more on the level of intensity of the maximal heart rate, however, this falls outside the scope of the results of this Delphi study. In the discussion we added information to this finding (see author response in discussion).*

The authors presented the results regarding the consensus but what about the stability of responses between successive rounds? This information would be very interesting to explore

***Author response***

*The statements were ranked in the second round of the Delphi study and individual panellist were asked to reconsider their ranking to join the rest of the group and reach consensus. Therefore, for most of the panellist the responses did not change.*



Figure 3 presents measurement tools across ICF domains. How do you explain the choice of these measurement tools knowing that other reliable scales exist in the literature?

***Author response***

*The presented measurement tools are based on the input of the expert panel. Apparently, these measurement tools are frequently used in practice. It might be conceivable that other measurement tools are more used in research or academic setting. We added to the limitations of the discussion: ‘This might have influenced the choice of the selected measurement tools or exercise intervention.’*

**Discussion**

The discussion point about high-intensity exercise interventions. This requires elaboration.

***Author response***

*We agree that high-intensity training is an important discussion point. In the discussion we added: ‘Therefore, high intensity exercises can certainly be considered to restore physical function in line with the international exercise recommendation<sup>18</sup>’*

I wonder if the novel finding of this study is “the expert consensus that exercise interventions should be tuned to the specific needs and goals of the patient.” Why was this information not identified in the results part?

***Author response***

*In the results section it is described as tailor-made exercise intervention. We added tailored in the discussion: ‘A novel finding of our study is the expert consensus that tailored exercise interventions should be tuned to the specific needs and goals (such as independent self-care, cooking or gardening) of the patient.’*

Finally, its required to highlight what makes this research novel or unique.

***Author response***

*In line with previous comments of the reviewers, we added information to the introduction to emphasize the novelty of this research. The novelty of this Delphi study is that this information was not available for older patients after discharge from hospital and can support healthcare providers in their daily practice.*
